# Supplementary material for: Speciation of borate in aqueous solutions studied experimentally by potentiometry and Raman spectroscopy and computationally by DFT calculations
Source: Royal Society of Chemistry journal article supplement (doi:10.1039/d3nj00751k), 2023-01-01
Supplement: d3nj00751k1.pdf [file d3nj00751k1.pdf]

ARTICLE

## Speciation of borate in aqueous solution studied experimentally by potentiometry and Raman spectroscopy and computationally by DFT calculation

Received 00th January 20xx,  
 Accepted 00th January 20xx

DOI: 10.1039/x0xx00000x

### Supporting Information

Huanhuan Liu,<sup>a</sup> Qian Liu,<sup>b</sup> Youshi Lan,<sup>b</sup> Di Wang,<sup>a</sup> Lifeng Zhang,<sup>a</sup> Xian Tang,<sup>a</sup> Suliang Yang,<sup>b</sup> Zhifu Luo,<sup>a\*</sup> Guoxin Tian<sup>b, c\*</sup>

#### The potentiometric titrations experimental conditions

In a typical titration, a solution (5.0 – 20.0 mL) containing the initial concentration of 0.01 - 0.7 M of boric acid and appropriate amount of 0.5 M NaClO<sub>4</sub> is titrated with 0.5 M NaOH. The titration cup was always kept in an argon atmosphere with small positive pressure to avoid the effect from the CO<sub>2</sub> in the air. The EMF data were gathered at intervals predetermined by the data collection criterion; for instance, the drift of EMF ( $\Delta E$ ) was less than 0.1 mV for 60 s. With starting solutions containing various concentrations of B(OH)<sub>3</sub> and HClO<sub>4</sub>, several titrations were carried out (See Table S1.). Using the program *Hyperquad* 2014<sup>[1]</sup>, the formation constants of borate ions were determined on a molar scale. The three standard deviations ( $3\sigma$ ) calculated by the computer program characterize the degree of uncertainty.

**Table S1.** The potentiometric titrations experimental conditions, 25 °C

| No. | V <sub>0</sub> /mL | C <sub>B</sub> <sup>0</sup> /M | C <sub>H</sub> <sup>0</sup> /M | C <sub>titre</sub> /M |
|-----|--------------------|--------------------------------|--------------------------------|-----------------------|
| 1   | 20.0               | 0.00998                        | 0.00514                        | 0.504                 |
| 2   | 20.0               | 0.0249                         | 0.00514                        | 0.504                 |
| 3   | 10.0               | 0.0499                         | 0.0103                         | 0.504                 |
| 4   | 10.0               | 0.0998                         | 0.0103                         | 0.504                 |
| 5   | 5.0                | 0.249                          | 0.0205                         | 0.504                 |
| 6   | 5.2                | 0.480                          | 0.0198                         | 0.504                 |
| 7   | 5.2                | 0.661                          | 0.0198                         | 0.504                 |

Where I=0.5 M NaClO<sub>4</sub>. V<sub>0</sub> denotes initial cup solution in mL. C<sub>B</sub><sup>0</sup> denotes initial cup Boron concentration in M. C<sub>H</sub><sup>0</sup> denotes initial cup Hydrogen ions concentration in M. C<sub>titre</sub> denotes the titrants concentration of NaOH in M.

#### The calculated vibrational frequencies and the vibrational modes

**Table S2** The calculated vibrational frequencies, the vibrational modes and Raman activity coefficient of borate ions. Where  $\nu_1, \nu_2, \nu_3, \nu_4$  are the characteristic vibrational modes related to the borate ions ( $\nu_{1a}$  and  $\nu_{1b}$  denotes two different symmetric stretching vibration of B<sub>4</sub>O<sub>5</sub>(OH)<sub>4</sub><sup>2-</sup>), while the  $\nu_{as}, \nu_b$  and  $\nu_c$  denotes asymmetrical stretching, molecular bending, and molecular dangling, respectively. Where B3 and B4 denotes the plane triangle boron and tetrahedron boron. The blue arrow in the diagram of the vibrational modes is the B-O symmetric stretching vibration. The green arrow is the vibration of the boron or oxygen atom in the direction of the arrow.

| species                               | Raman vibrational frequencies/cm <sup>-1</sup> |      | Raman activity coefficient<br>(/A <sup>4</sup> /AMU) | The vibrational modes | Diagram of the vibrational modes |
|---------------------------------------|------------------------------------------------|------|------------------------------------------------------|-----------------------|----------------------------------|
|                                       | exp.                                           | cal. |                                                      |                       |                                  |
|                                       | -                                              | 536  | 3.40                                                 | $\nu_c(\text{O-H})$   | -                                |
|                                       | -                                              | 538  | 3.41                                                 | $\nu_c(\text{O-H})$   | -                                |
|                                       | -                                              | 665  | 0.00                                                 | $\nu_c(\text{B})$     | -                                |
|                                       |                                                |      |                                                      |                       |                                  |
| $\text{B(OH)}_3$                      | 874                                            | 877  | 7.47                                                 | $\nu_1$               |                                  |
|                                       | -                                              | 1037 | 3.67                                                 | $\nu_c(\text{O-H})$   | -                                |
|                                       | -                                              | 1038 | 3.62                                                 | $\nu_c(\text{O-H})$   | -                                |
|                                       | -                                              | 1044 | 0.16                                                 | $\nu_c(\text{O-H})$   | -                                |
| $\text{B(OH)}_4^-$                    | -                                              | 521  | 0.60                                                 | $\nu_b(\text{O-B-O})$ | -                                |
|                                       | 741                                            | 728  | 4.62                                                 | $\nu_1$               |                                  |
|                                       | -                                              | 866  | 3.64                                                 | $\nu_c(\text{O-H})$   | -                                |
|                                       | -                                              | 1018 | 0.03                                                 | $\nu_c(\text{B})$     | -                                |
| $\text{B}_3\text{O}_3(\text{OH})_4^-$ | -                                              | 1026 | 1.06                                                 | $\nu_c(\text{O-H})$   | -                                |
|                                       | -                                              | 1070 | 10.09                                                | $\nu_c(\text{O-H})$   | -                                |
|                                       | -                                              | 537  | 0.19                                                 | $\nu_c(\text{O-H})$   | -                                |
|                                       | -                                              | 537  | 6.08                                                 | $\nu_c(\text{O-H})$   | -                                |
| $\text{B}_3\text{O}_3(\text{OH})_4^-$ | -                                              | 548  | 0.70                                                 | $\nu_c(\text{O-H})$   | -                                |
|                                       | 610                                            | 593  | 5.34                                                 | $\nu_1$               |                                  |
|                                       | -                                              | 674  | 0.81                                                 | $\nu_c(\text{B3})$    | -                                |

|                                          |      |       |                        |                                                                                       |
|------------------------------------------|------|-------|------------------------|---------------------------------------------------------------------------------------|
| -                                        | 722  | 1.47  | $\nu_b(\text{O-B4-O})$ | -                                                                                     |
| -                                        | 723  | 0.16  | $\nu_c(\text{B3})$     | -                                                                                     |
| -                                        | 787  | 0.32  | $\nu_c(\text{B4})$     | -                                                                                     |
| -                                        | 860  | 4.43  | $\nu_{as}$             | -                                                                                     |
| -                                        | 937  | 4.67  | $\nu_c(\text{B4})$     | -                                                                                     |
| -                                        | 986  | 0.01  | $\nu_{as}$             | -                                                                                     |
| -                                        | 1040 | 0.59  | $\nu_c(\text{O-H})$    | -                                                                                     |
| -                                        | 1095 | 0.16  | $\nu_c(\text{O-H})$    | -                                                                                     |
| -                                        | 1098 | 4.13  | $\nu_c(\text{O-H})$    | -                                                                                     |
| -                                        | 1189 | 4.84  | $\nu_c(\text{O-H})$    | -                                                                                     |
| 525                                      | 513  | 7.31  | $\nu_1$                | 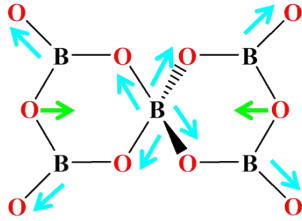   |
| -                                        | 533  | 0.00  | $\nu_c(\text{O-H})$    | -                                                                                     |
| -                                        | 537  | 10.32 | $\nu_c(\text{O-H})$    | -                                                                                     |
| -                                        | 540  | 0.03  | $\nu_c(\text{O-H})$    | -                                                                                     |
| -                                        | 550  | 1.03  | $\nu_c(\text{O-H})$    | -                                                                                     |
| $\text{B}_5\text{O}_6(\text{OH})_4^{2-}$ | 668  | 0.00  | $\nu_c(\text{B3})$     | -                                                                                     |
| -                                        | 671  | 0.93  | $\nu_c(\text{B3})$     | -                                                                                     |
| -                                        | 718  | 0.11  | $\nu_c(\text{B3})$     | -                                                                                     |
| -                                        | 723  | 0.53  | $\nu_b(\text{O-B-O})$  | -                                                                                     |
| 760                                      | 758  | 4.22  | $\nu_2$                |  |
| -                                        | 789  | 2.21  | $\nu_{as}$             | -                                                                                     |

|                                                               |     |      |                         |                      |                                                                                       |
|---------------------------------------------------------------|-----|------|-------------------------|----------------------|---------------------------------------------------------------------------------------|
| B <sub>4</sub> O <sub>5</sub> (OH) <sub>4</sub> <sup>2-</sup> | 915 | 891  | 8.40                    | v <sub>4</sub>       | 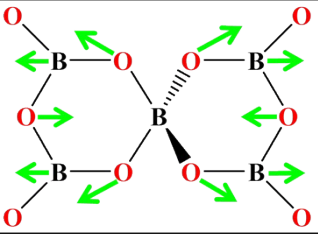   |
|                                                               | -   | 925  | 0.24                    | v <sub>c</sub> (B4)  | -                                                                                     |
|                                                               | 994 | 1005 | 1.22                    | v <sub>3</sub>       |    |
|                                                               | -   | 1032 | 0.00                    | v <sub>c</sub> (B4)  | -                                                                                     |
|                                                               | -   | 1101 | 0.25                    | v <sub>c</sub> (O-H) | -                                                                                     |
|                                                               | -   | 1111 | 12.66                   | v <sub>c</sub> (O-H) | -                                                                                     |
|                                                               | -   | 1160 | 0.86                    | v <sub>c</sub> (B4)  | -                                                                                     |
|                                                               | -   | 510  | 3.87                    | v <sub>c</sub> (O-H) | -                                                                                     |
|                                                               | -   | 516  | 4.88                    | v <sub>c</sub> (O-H) | -                                                                                     |
|                                                               | 563 | 547  | 7.92                    | v <sub>1a</sub>      |  |
|                                                               | -   | 550  | 0.20                    | v <sub>c</sub> (B4)  | -                                                                                     |
|                                                               | -   | 564  | 0.38                    | v <sub>c</sub> (B4)  | -                                                                                     |
|                                                               | -   | 666  | 0.03                    | v <sub>c</sub> (B3)  | -                                                                                     |
|                                                               | -   | 702  | 0.46                    | v <sub>c</sub> (B3)  | -                                                                                     |
|                                                               | -   | 714  | 1.46                    | v <sub>c</sub> (B3)  | -                                                                                     |
| -                                                             | 755 | 2.66 | v <sub>b</sub> (O-B3-O) | -                    |                                                                                       |
| -                                                             | 758 | 0.65 | v <sub>c</sub> (B4)     | -                    |                                                                                       |
| -                                                             | 820 | 0.84 | v <sub>c</sub> (B4)     | -                    |                                                                                       |
| -                                                             | 836 | 2.14 | v <sub>c</sub> (B4)     | -                    |                                                                                       |
| -                                                             | 889 | 2.42 | v <sub>c</sub> (B4)     | -                    |                                                                                       |
| -                                                             | 907 | 0.71 | v <sub>c</sub> (B4)     | -                    |                                                                                       |

|                                          |      |      |                        |                                                                                       |
|------------------------------------------|------|------|------------------------|---------------------------------------------------------------------------------------|
| 938                                      | 937  | 3.91 | $\nu_{1b}$             | 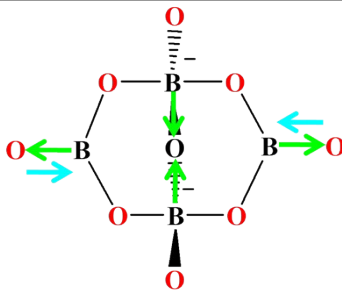   |
| -                                        | 1004 | 0.40 | $\nu_c(\text{B4})$     | -                                                                                     |
| -                                        | 1080 | 0.56 | $\nu_c(\text{O-H})$    | -                                                                                     |
| -                                        | 1090 | 3.89 | $\nu_c(\text{O-H})$    | -                                                                                     |
| -                                        | 1123 | 2.49 | $\nu_c(\text{O-H})$    | -                                                                                     |
| -                                        | 1138 | 0.46 | $\nu_c(\text{O-H})$    | -                                                                                     |
| -                                        | 1147 | 1.21 | $\nu_c(\text{B4})$     | -                                                                                     |
| -                                        | 502  | 2.55 | $\nu_b(\text{O-B4-O})$ | -                                                                                     |
| -                                        | 510  | 3.80 | $\nu_c(\text{O-H})$    | -                                                                                     |
| -                                        | 537  | 2.66 | $\nu_c(\text{O-H})$    | -                                                                                     |
| -                                        | 557  | 0.49 | $\nu_c(\text{B4})$     | -                                                                                     |
| 612                                      | 589  | 5.34 | $\nu_1$                |  |
| $\text{B}_3\text{O}_3(\text{OH})_5^{2-}$ | -    | 678  | $\nu_c(\text{O-H})$    | -                                                                                     |
| -                                        | 698  | 1.21 | $\nu_c(\text{B3})$     | -                                                                                     |
| -                                        | 721  | 1.37 | $\nu_c(\text{B3})$     | -                                                                                     |
| -                                        | 732  | 2.24 | $\nu_{as}$             | -                                                                                     |
| -                                        | 758  | 1.86 | $\nu_c(\text{B4})$     | -                                                                                     |
| -                                        | 818  | 3.77 | $\nu_c(\text{B4})$     | -                                                                                     |
| -                                        | 882  | 1.82 | $\nu_c(\text{O-H})$    | -                                                                                     |
| -                                        | 929  | 0.84 | $\nu_1(\text{B3-O})$   | -                                                                                     |
| -                                        | 967  | 2.50 | $\nu_c(\text{B4})$     | -                                                                                     |
| -                                        | 1032 | 2.36 | $\nu_c(\text{O-H})$    | -                                                                                     |

## ARTICLE

## Journal Name

|   |      |      |                     |   |
|---|------|------|---------------------|---|
| - | 1071 | 2.84 | $\nu_c(\text{O-H})$ | - |
| - | 1093 | 3.22 | $\nu_c(\text{O-H})$ | - |
| - | 1147 | 1.33 | $\nu_c(\text{O-H})$ | - |
| - | 1185 | 1.55 | $\nu_c(\text{O-H})$ | - |

**Notes and references**

a Department of Nuclear Technology and Application, China Institute of Atomic Energy, Beijing 102413, China. E-mail: luozhifu1001@aliyun.com

b Department of Radiochemistry, China Institute of Atomic Energy, Beijing 102413, China. E-mail: gtian@ciae.ac.cn

c Institute of Nuclear and New Energy Technology, Tsinghua University, Beijing 100084, China.

- 1 P. Gans, A. Sabatini and A. Vacca, *Talanta*, 1996, 43, 1739-1753.
